# Supplementary material for: CXCR4/CXCR7/CXCL12-Axis in Follicular Thyroid Carcinoma
Source: PubMed Central journal article supplement — J Cancer. 2018 Feb 27;9(6):929–40. doi: 10.7150/jca.23042 (PMC5868160; doi:10.7150/jca.23042), 2018-02-27
Supplement: jcav09p0929s1.pdf [file jcav09p0929s1.pdf]

| <b>Table S1: Primer sequences</b> |                            |
|-----------------------------------|----------------------------|
| <b>Gene</b>                       | <b>Primer sequence</b>     |
| BST-2_L                           | ccacctgcaaccacactg         |
| BST-2_R                           | cctgaagcttatggtttaatgtagtg |
| FGF9_L                            | ggactctacctcgggatgaa       |
| FGF9_R                            | tctctgaatacacactcttgggta   |
| SNAI1_L                           | gctgcaggactctaataccaga     |
| SNAI1_R                           | atctccggaggtgggatg         |
| TWIST_L                           | agctacgccttctcggctct       |
| TWIST_R                           | ccttctctggaaacaatgacatc    |
| E-Cadherin_L                      | tggaggaattcttgctttgc       |
| E-Cadherin_R                      | cgctctcctccgaagaaac        |
| Vimentin_L                        | tacaggaagctgctggaagg       |
| Vimentin_R                        | accagagggagtgaatccag       |
